# Supplementary material
Source: ML conference proceedings conference paper supplement (https://proceedings.neurips.cc/paper_files/paper/2011/hash/ac796a52db3f16bbdb6557d3d89d1c5a-Abstract.html)
Supplement: Supplementary file [file ac796a52db3f16bbdb6557d3d89d1c5a-Supplemental.zip]

# 1 Column Generation Method for Structured Output Learning

---

**Algorithm 1** Column Generation Method for Structured Output Learning

---

```

1:  $\mathbf{w}^{(1)} = \mathbf{w}_p$ 
2:  $k = 1$  and  $\Gamma_i = \emptyset \quad \forall i$ 
3: repeat
4:   for  $i = 1, \dots, n$  do
5:      $\mathbf{y}^* = \operatorname{argmax}_{\mathbf{y} \in \Upsilon} \{ \langle \mathbf{w}^{(k)}, \Psi(\mathbf{x}_i, \mathbf{y}) \rangle + \Delta(\mathbf{y}_i, \mathbf{y}) \}$ 
6:     if  $\langle \mathbf{w}^{(k)}, \Psi(\mathbf{x}_i, \mathbf{y}^*) \rangle + \Delta(\mathbf{y}_i, \mathbf{y}^*) > \max_{(\Psi, \Delta) \in \Gamma_i} \{ \langle \mathbf{w}^{(k)}, \Psi \rangle + \Delta \}$  then
7:        $\Gamma_i = \Gamma_i \cup (\Psi(\mathbf{x}_i, \mathbf{y}^*), \Delta(\mathbf{y}_i, \mathbf{y}^*))$ 
8:     end if
9:   end for
10:   $\mathbf{w}^{(k)} = \operatorname{argmin}_{\mathbf{w} \in \mathcal{H}} \left\{ R_{p, \gamma}(\mathbf{w}) + C \sum_{i=1}^n \ell \left( \max_{(\Psi, \Delta) \in \Gamma_i} \{ \langle \mathbf{w}, \Psi \rangle + \Delta \} - \langle \mathbf{w}, \Psi(\mathbf{x}_i, \mathbf{y}_i) \rangle \right) \right\}$ 
11:   $k = k + 1$ 
12: until no changes in  $(\Psi_i, \Delta_i) \quad \forall i$ 

```

---

## 2 Details on Eukaryotic Gene Finding

These sections provide additional detail on our method for inferring the exon-intron structure of eukaryotic genes using RNA-seq data and computational splice site predictions.

RNA-seq data for *C. elegans* was acquired using a strand-specific, paired-end protocol for Illumina sequencing (2x76bp read length).

Subsequently, RNA-seq reads were mapped to the genome using methods able to align reads across splice junctions (we used [3], other possibilities include [2, 7]). Moreover, we exploited splice site predictions made from the genome sequence with SVMs and string kernels as described previously [6]. Their incorporation into gene prediction was done in a way that is very similar to a recently developed gene finding system [5].

The structured-output inference methods used here extend a previously published approach [9] based on hidden Markov support vector machines [1, 8]. In essence, feature values from the input sequence  $\mathbf{x}$  are transformed by piecewise linear functions, which depend on the state  $\mathbf{y}_i$  and feature type. These thus make up an integral part of  $\Psi(\mathbf{x}, \mathbf{y})$ , and their parametrization constitutes part of the parameter vector  $\mathbf{w}$  [9, 4]. The result of these feature transformations is linearly combined in a discriminant function  $F(\mathbf{x}, \mathbf{y}; \mathbf{w})$  to yield  $F(\mathbf{x}, \mathbf{y}; \mathbf{w}) = \langle \mathbf{w}, \Psi(\mathbf{x}, \mathbf{y}) \rangle$  [1, 8, 9]. Since the discriminant function assigns a real-valued score to a combination of feature sequence  $\mathbf{x}$  and label sequence

$\mathbf{y}$ , decoding for its argmax yields the highest-scoring label sequence with for a given  $\mathbf{x}$  and  $\mathbf{w}$  [1, 8, 9].

## 2.1 Features

The following features derived from RNA-seq read alignments (independent of the label sequence  $\mathbf{y}$ ) were used as input sequence  $\mathbf{x}$ :

- number of reads aligned at the given position, indicating an exon.
- number of spliced reads that span the given position (strand-specific), indicating an intron.
- number of spliced reads supporting a donor splice site at the given position (strand-specific).
- number of spliced reads supporting an acceptor splice site (strand-specific).
- number of paired-read alignments spanning the given position (if read pair information is available, strand-specific), an indicator of transcript connectivity.

Moreover, we used splice site prediction features (see [6] for details):

- donor splice site prediction transformed to a probabilistic confidence (strand-specific).
- probabilistic acceptor splice site prediction confidence (strand-specific).

## 2.2 State model

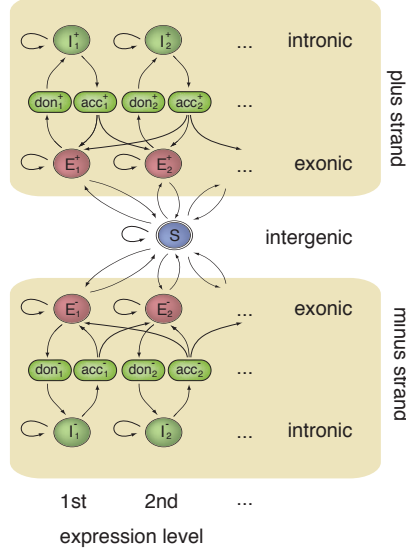

Figure 1: State model utilized for eukaryotic gene finding. Ovals correspond to states and arrows indicate allowed transitions. The correspondence between states and atomic labels is color-coded. The first and last intron states are associated with splice site signals at exon-intron junctions. The model is strand-specific and consists of econfirmation-specific submodels (columns and state-subscripts, see label at bottom) which allows optimizing different parameter sets depending on the experimental support of a given gene.

## 2.3 Loss function

The loss function captures our problem-specific knowledge about how much a given label sequence deviates and from the correct one and how the margin should be rescaled. The loss  $\Delta(\mathbf{y}, \hat{\mathbf{y}})$  between the correct label sequence  $\mathbf{y}$  and any predicted labeling  $\hat{\mathbf{y}}$  is composed of position-wise loss terms:

$$\Delta(\mathbf{y}, \hat{\mathbf{y}}) = \sum_{i=1}^{|\mathbf{y}|} \delta_b(y_i, \hat{y}_i) + \delta_s(y_i, \hat{y}_i) + \delta_{ei}(y_i, \hat{y}_i) + \delta_{fp}(y_i, \hat{y}_i) + \delta_{fn}(y_i, \hat{y}_i).$$

Most importantly, we penalize wrong segment boundaries by an intron-boundary loss:

$$\delta_b(y_i, \hat{y}_i) = \begin{cases} 10 & \text{if } y_i \neq \hat{y}_i \text{ and any of them is the first or last intron position} \\ & \text{(any acc or don state, see Fig. 1),} \\ 0 & \text{otherwise.} \end{cases}$$

Additionally there is a loss for predictions on the wrong strand:

$$\delta_s(y_i, \hat{y}_i) = \begin{cases} 0.1 & \text{if } y_i \text{ and } \hat{y}_i \text{ correspond to different strands (see Fig. 1),} \\ 0 & \text{otherwise,} \end{cases}$$

a loss for exon-intron confusions:

$$\delta_{ei}(y_i, \hat{y}_i) = \begin{cases} 0.1 & \text{if either } y_i \text{ or } \hat{y}_i \text{ is an exon state} \\ & \text{and the other one an intron state (see Fig. 1),} \\ 0 & \text{otherwise,} \end{cases}$$

a loss for positions in false-positive gene predictions:

$$\delta_{fp}(y_i, \hat{y}_i) = \begin{cases} 0.5 & \text{if } y_i \neq \hat{y}_i \text{ and } y_i = S \text{ (see Fig. 1)} \\ 0 & \text{otherwise,} \end{cases}$$

and a loss for positions in false-negative gene predictions:

$$\delta_{fn}(y_i, \hat{y}_i) = \begin{cases} 0.5 & \text{if } y_i \neq \hat{y}_i \text{ and } \hat{y}_i = S \text{ (see Fig. 1)} \\ 0 & \text{otherwise.} \end{cases}$$

Furthermore there are smaller loss terms ( $< 0.05$ , omitted above) for exon states with incorrect expression level.

### 3 Tabular Results for Prokaryotic MTL

|                      | Independent | (std)  | Union  | (std)  | MTL    | (std)  |
|----------------------|-------------|--------|--------|--------|--------|--------|
| <i>E.coli</i>        | 0.7985      | 0.0445 | 0.9501 | 0.0100 | 0.9573 | 0.0125 |
| <i>E.fergusonii</i>  | 0.7262      | 0.0303 | 0.9573 | 0.0065 | 0.9651 | 0.0027 |
| <i>A.tumefaciens</i> | 0.7796      | 0.0744 | 0.8707 | 0.0362 | 0.9112 | 0.0111 |
| <i>H.pylori</i>      | 0.7760      | 0.0983 | 0.9424 | 0.0087 | 0.9533 | 0.0133 |
| <i>B.anthraxis</i>   | 0.8387      | 0.0490 | 0.9184 | 0.0257 | 0.9234 | 0.0198 |
| <i>B.subtilis</i>    | 0.7652      | 0.1751 | 0.9399 | 0.0243 | 0.9453 | 0.0283 |
| <i>M.smithii</i>     | 0.9048      | 0.0136 | 0.9392 | 0.0106 | 0.9416 | 0.0072 |
| <i>S.islandicus</i>  | 0.8151      | 0.0595 | 0.9149 | 0.0115 | 0.9263 | 0.0096 |
| mean                 | 0.8005      | 0.0681 | 0.9291 | 0.0167 | 0.9404 | 0.0131 |

## References

- [1] Y. Altun, I. Tsochantaridis, and T. Hofmann. Hidden Markov support vector machines. *Proceedings of ICML*, 2003.
- [2] F. D. Bona, S. Ossowski, K. Schneeberger, and G. Rätsch. Optimal spliced alignments of short sequence reads. *Bioinformatics*, 24(16):i174–80, 2008.
- [3] G. Jean, A. Kahles, V. T. Sreedharan, F. D. Bona, and G. Rätsch. RNA-seq read alignments with PALMapper. *Current Protocols in Bioinformatics*, 32:11.6.1–11.6.38, 2010.
- [4] G. Rätsch and S. Sonnenburg. Large scale hidden semi-Markov SVMs. *Proceedings of NIPS*, 2007.

- [5] G. Schweikert, A. Zien, G. Zeller, J. Behr, C. Dieterich, C. S. Ong, P. Philips, F. D. Bona, L. Hartmann, A. Bohlen, N. Krüger, S. Sonnenburg, and G. Rätsch. mGene: Accurate SVM-based gene finding with an application to nematode genomes. *Genome Research*, 2009.
- [6] S. Sonnenburg, G. Schweikert, P. Philips, J. Behr, and G. Rätsch. Accurate splice site prediction using support vector machines. *BMC Bioinformatics*, 8 Suppl 10:S7, 2007.
- [7] C. Trapnell, L. Pachter, and S. L. Salzberg. TopHat: discovering splice junctions with RNA-Seq. *Bioinformatics*, 25(9):1105–1111, 2009.
- [8] I. Tsochantaridis, T. Joachims, T. Hofmann, and Y. Altun. Large margin methods for structured and interdependent output variables. *Journal of Machine Learning Research*, 2006.
- [9] G. Zeller, S. R. Henz, S. Laubinger, D. Weigel, and G. Rätsch. Transcript normalization and segmentation of tiling array data. *Pacific Symposium on Biocomputing*, pages 527–38, 2008.
